# Supplementary material for: Prevalence of Parasitic Infections with Zoonotic Potential in Tilapia: A Systematic Review and Meta-Analysis
Source: MDPI journal article supplement (doi:10.3390/ani12202800), 2022-10-17
Supplement: s1 [file s1]

**Table S1.** Parasites of tilapia with zoonotic potential according with the available scientific literature.

| <b>Authors</b>                | <b>Parasite</b>             | <b>Taxonomic group</b> | <b>Infective stage</b> | <b>Cichlid host/Anatomical region</b>                                                          |
|-------------------------------|-----------------------------|------------------------|------------------------|------------------------------------------------------------------------------------------------|
| (19,29,83-85)                 | <i>Centrocestus</i> spp.    | Trematoda              | Metacercariae          | <i>Oreochromis</i> spp.<br><i>Sarotherodon</i> spp.                                            |
| (28,86-97)                    | <i>Clinostomum</i> spp.     | Trematoda              | Metacerariae           | <i>Oreochromis</i> spp.<br><i>Sarotherodon</i> spp.<br><i>Tilapia</i> spp.<br><i>Vieja</i> pp. |
| (12,21,86,89–91,94,95,97–101) | <i>Contracaecum</i> spp.    | Nematoda               | L3 Larva               | <i>Oreochromis</i> spp.<br><i>Tilapia</i> spp.<br><i>Vieja</i> pp.                             |
| (23)                          | <i>Cryptosporidium</i> spp. | Protozoa               | Trophozoites           | <i>Oreochromis</i> spp.                                                                        |
| (102)                         | Echinostomatidae            | Trematoda              | Metacercariae          | <i>Oreochromis</i> spp.                                                                        |
| (103)                         | <i>Echinostoma</i> spp.     | Trematoda              | Metacercariae          | <i>Oreochromis</i> spp.                                                                        |
| (91,94)                       | <i>Eustrongylides</i> spp.  | Nematoda               | L3 Larva               | <i>Oreochromis</i> spp.                                                                        |
| (23)                          | <i>Giardia</i> spp.         | Protozoa               | Trophozoites           | <i>Tilapia</i> spp.                                                                            |
| (20,49,104)                   | <i>Gnathostoma</i> spp.     | Nematoda               | L3 Larva               | <i>Oreochromis</i> spp.                                                                        |
| (13,15-17,19,33,83,105–115)   | <i>Haplorchis</i> spp.      | Trematoda              | Metacercariae          | <i>Oreochromis</i> spp.<br><i>Sarotherodon</i> spp.<br><i>Tilapia</i> spp.                     |
| (34,98,109,113,116)           | <i>Heterophyes</i> spp.     | Trematoda              | Metacercariae          | <i>Oreochromis</i> spp.<br><i>Tilapia</i> spp.                                                 |
| (102)                         | Heterophyidae               | Trematoda              | Metacercariae          | <i>Oreochromis</i> spp.                                                                        |
| (32)                          | <i>Opisthorchis</i> spp.    | Trematoda              | Metacercariae          | <i>Oreochromis</i> spp.                                                                        |
| (16,33,113)                   | <i>Phagicola</i> spp.       | Trematoda              | Metacercariae          | <i>Tilapia</i> spp.                                                                            |

|                 |                          |           |                       |                                                |
|-----------------|--------------------------|-----------|-----------------------|------------------------------------------------|
| (13,17)         | <i>Procerovum</i> spp.   | Trematoda | Metacercariae         | <i>Oreochromis</i> spp.<br><i>Tilapia</i> spp. |
| (16,33,109,113) | <i>Pygidiopsis</i> spp.  | Trematoda | Metacercariae         | <i>Tilapia</i> spp.                            |
| (117)           | <i>Schyzocotyle</i> spp. | Cestoda   | Plerocercoid<br>larva | <i>Ptychochromis</i><br>spp.                   |
| (26)            | <i>Vermoameba</i> spp.   | Amoeba    | Trophozoites          | <i>Oreochromis</i> spp.                        |
